# Supplementary material for: Platinum(iv) combo prodrugs containing cyclohexane-1R,2R-diamine, valproic acid, and perillic acid as a multiaction chemotherapeutic platform for colon cancer
Source: Royal Society of Chemistry journal article supplement (doi:10.1039/d3dt01876h), 2023-01-01
Supplement: d3dt01876h1.pdf [file d3dt01876h1.pdf]

**Platinum(IV) combo prodrugs containing cyclohexane-1*R*,2*R*-diamine, valproic acid, and perillic acid as a multiaction chemotherapeutic platform for colon cancer**

Elisabetta Gabano,<sup>a</sup> Marzia Bruna Gariboldi,<sup>b</sup> Emanuela Marras,<sup>b</sup> Francesca Barbato,<sup>c</sup> Mauro Ravera <sup>\*c</sup>

<sup>a</sup>Dipartimento per lo Sviluppo Sostenibile e la Transizione Ecologica, Università del Piemonte Orientale, Piazza Sant'Eusebio 5, 13100 Vercelli, Italy.

<sup>b</sup>Dipartimento di Biotecnologie e Scienze della Vita, Università dell'Insubria, Via Dunant 3, 21100 Varese, Italy.

<sup>c</sup>Dipartimento di Scienze e Innovazione Tecnologica, Università del Piemonte Orientale, Viale Michel 11, 15121 Alessandria (Italy); [mauro.ravera@uniupo.it](mailto:mauro.ravera@uniupo.it)

**SUPPLEMENTARY MATERIAL**

**Content:**

**Scheme S1.** Sketch of the complexes under investigation and the corresponding synthetic pathways.  
Numbering scheme for the assignment of NMR signals

**Figure S1-Figure S4:** NMR spectra of **4**

**Figure S5-Figure S8:** NMR spectra of **5**

**Figure S9-Figure S11:** NMR spectra of **6**

**Figure S12-Figure S15:** NMR spectra of **7**

**Figure S16-Figure S21:** NMR spectra of **8**

**Figure S22-Figure S27:** NMR spectra of **9**

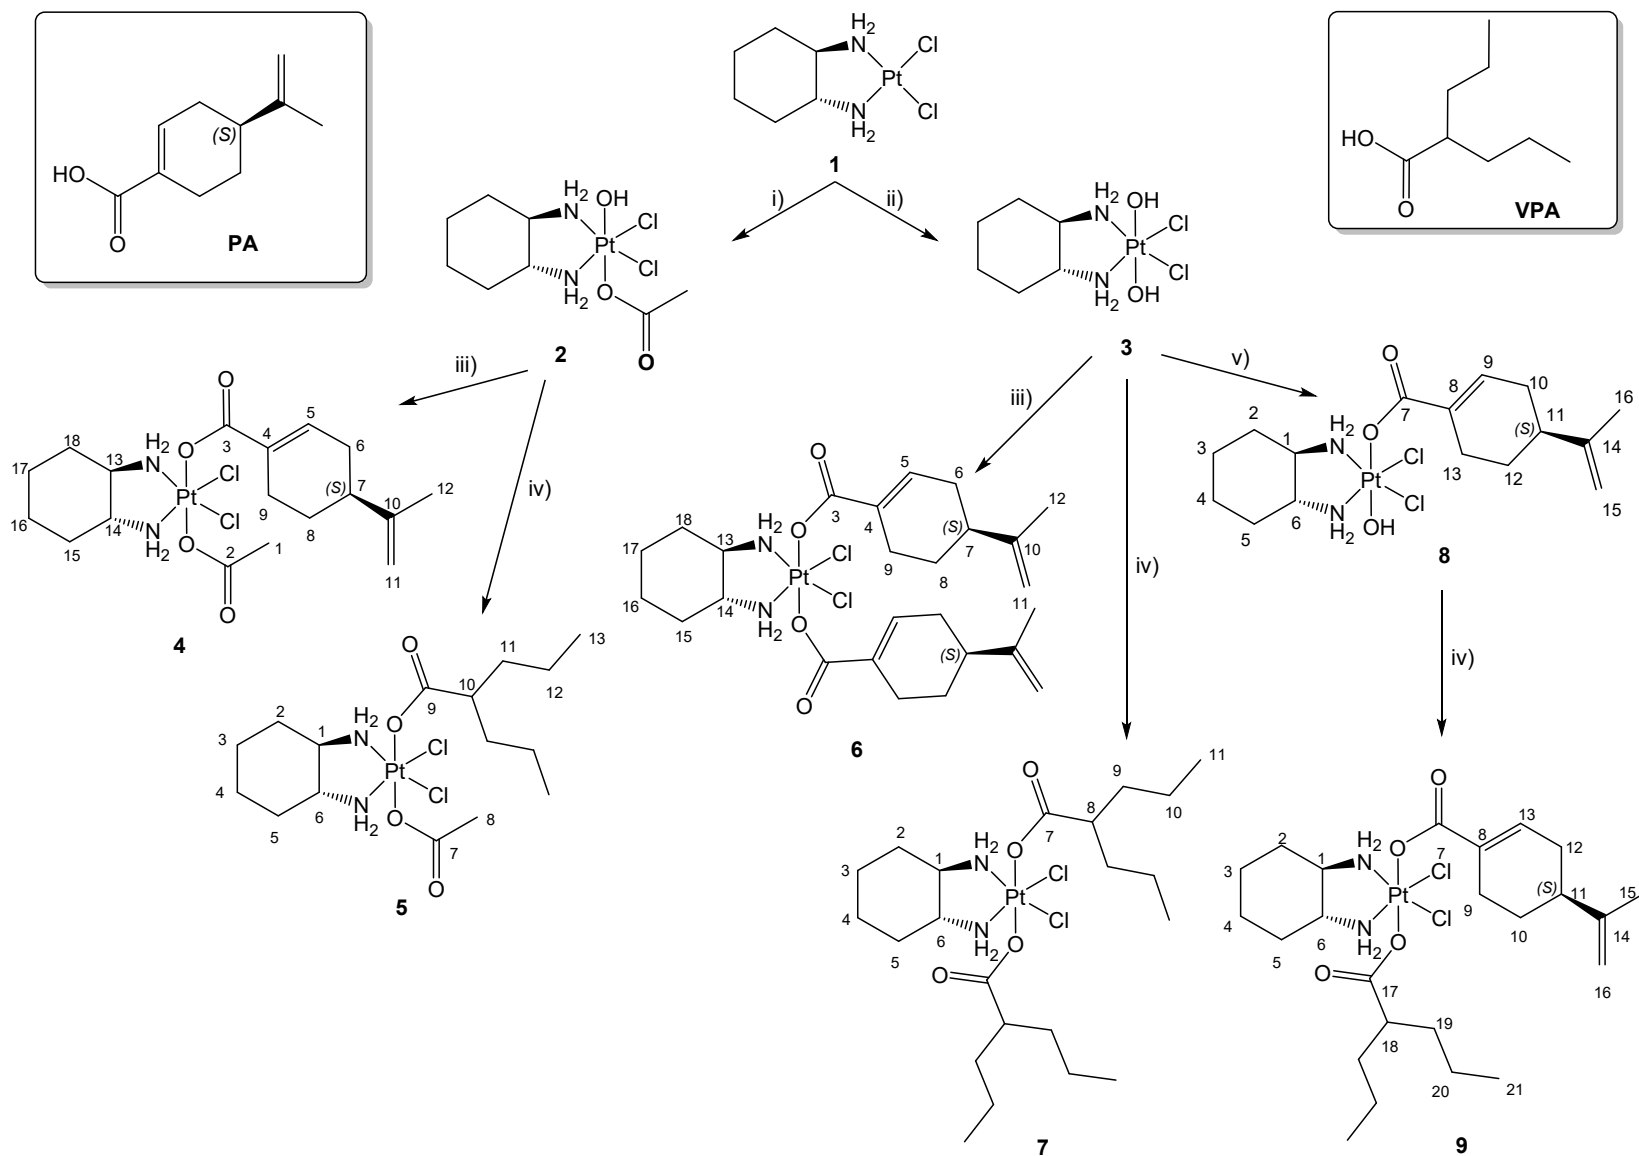

**Scheme S1.** Sketch of the complexes under investigation and the corresponding synthetic pathways: *i)*  $\text{H}_2\text{O}_2/\text{H}_2\text{O}$ ; *ii)*  $\text{H}_2\text{O}_2/\text{CH}_3\text{COOH}$ ; *iii)* acyl chloride of **PA**, microwave heating,  $\text{CH}_3\text{CN}$ , pyridine, *iv)* acyl chloride of **VPA**, microwave,  $\text{CH}_3\text{CN}$ , pyridine; *v)* perillic anhydride, DMSO. Numbering scheme for the assignment of NMR signals is also reported.

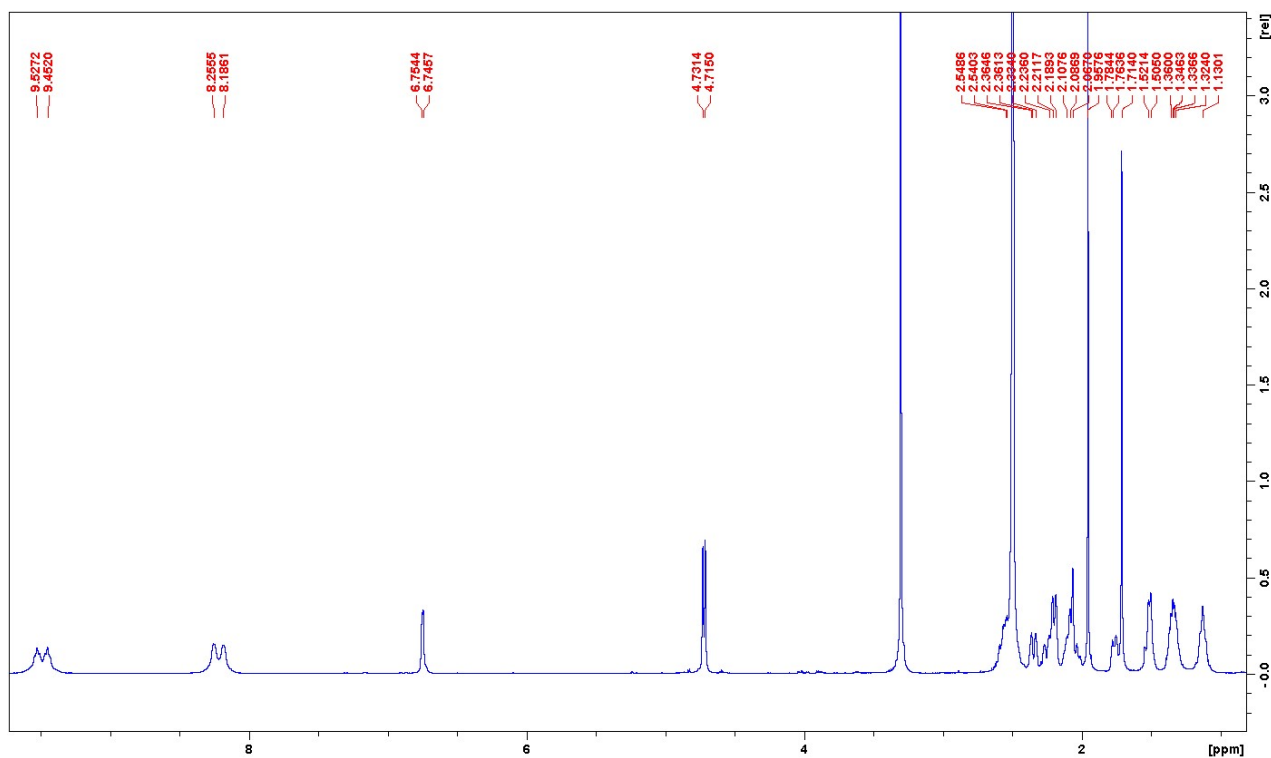

Figure S1.  $^1\text{H}$  NMR spectrum of **4** in  $\text{DMSO-d}_6$ .

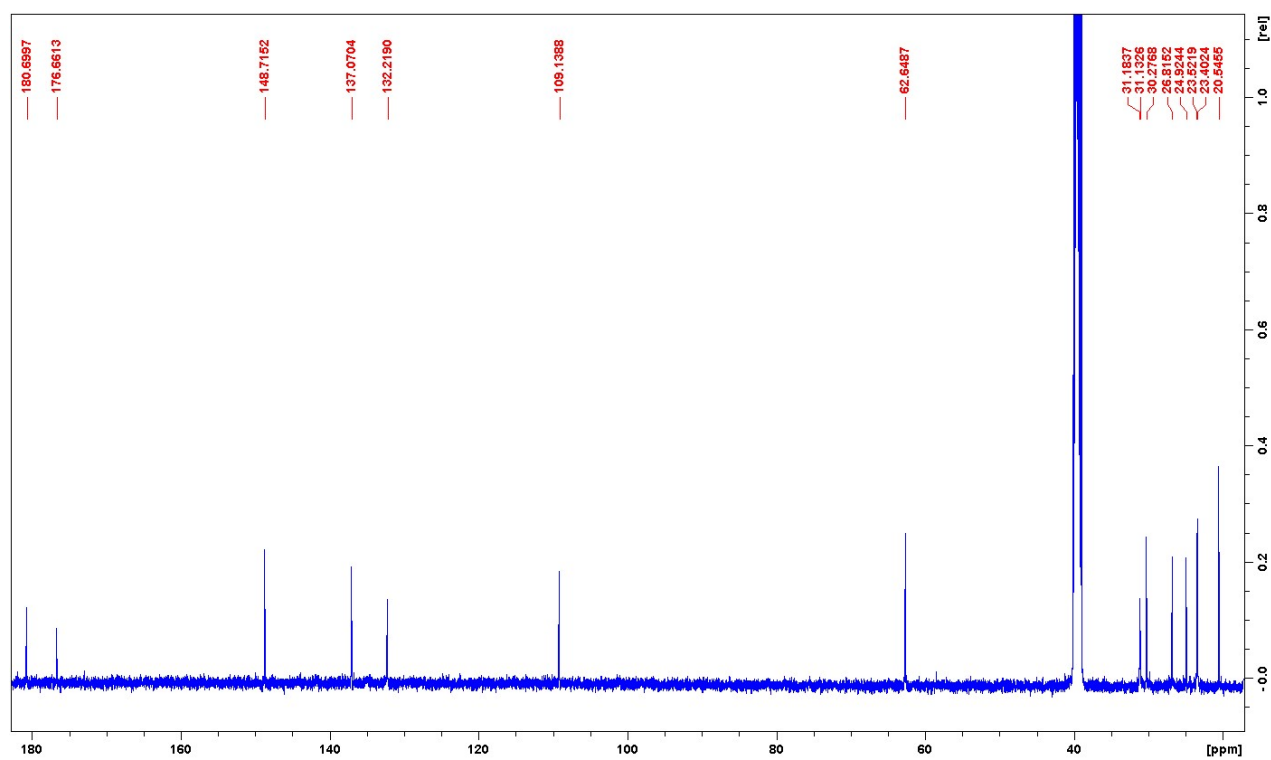

Figure S2.  $^{13}\text{C}$  NMR spectrum of **4** in  $\text{DMSO-d}_6$ .

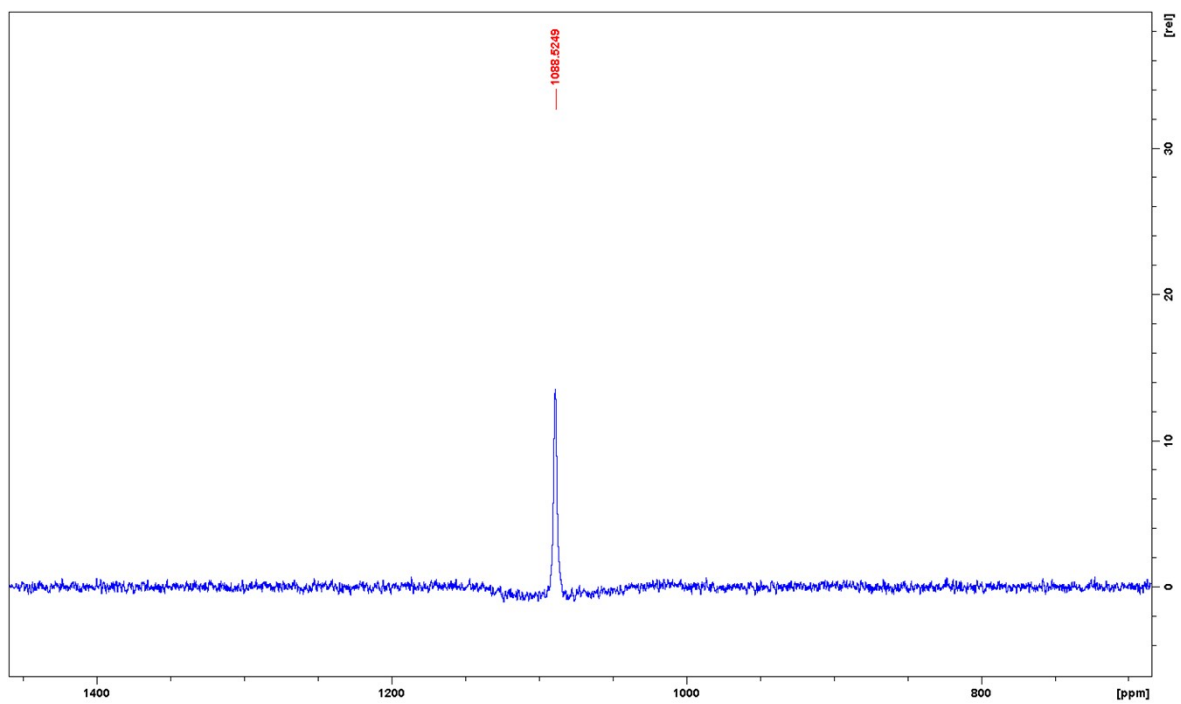

**Figure S3.**  $^{195}\text{Pt}$  NMR spectrum of **4** in  $\text{DMSO-d}_6$ .

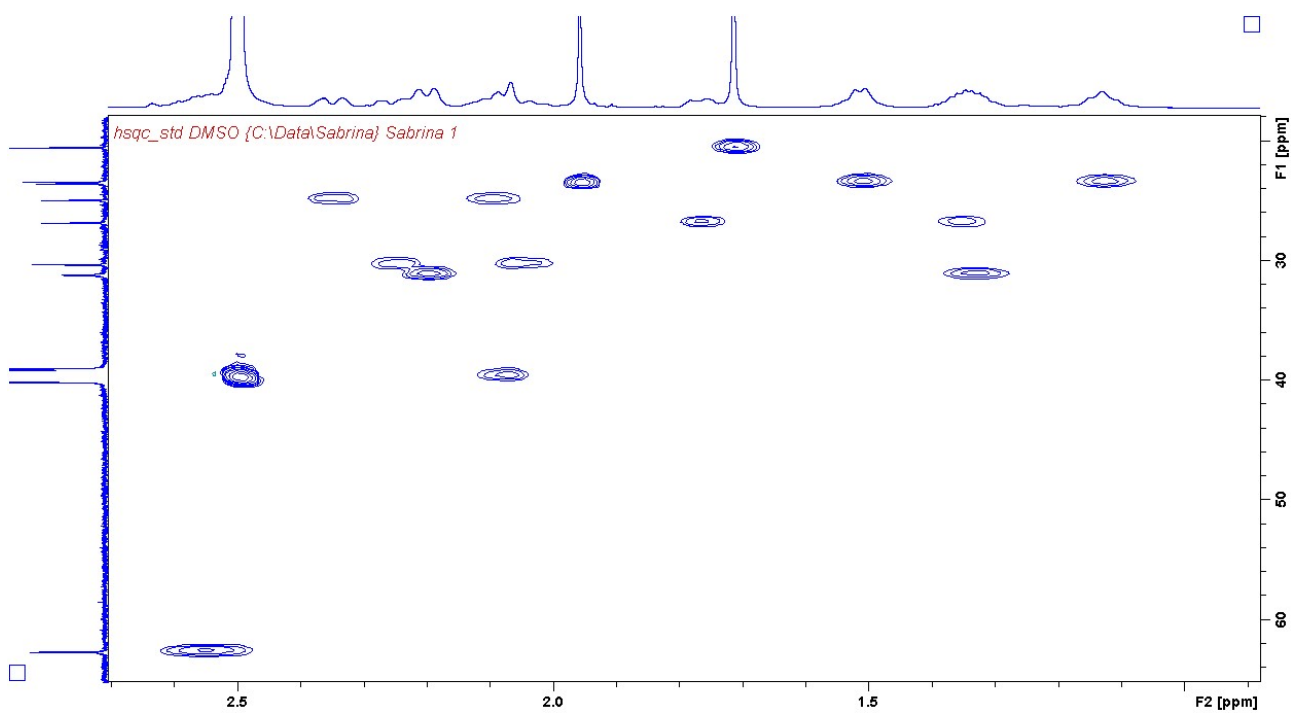

**Figure S4.**  $^1\text{H}$ - $^{13}\text{C}$  HSQC NMR spectrum of **4** in  $\text{DMSO-d}_6$ .

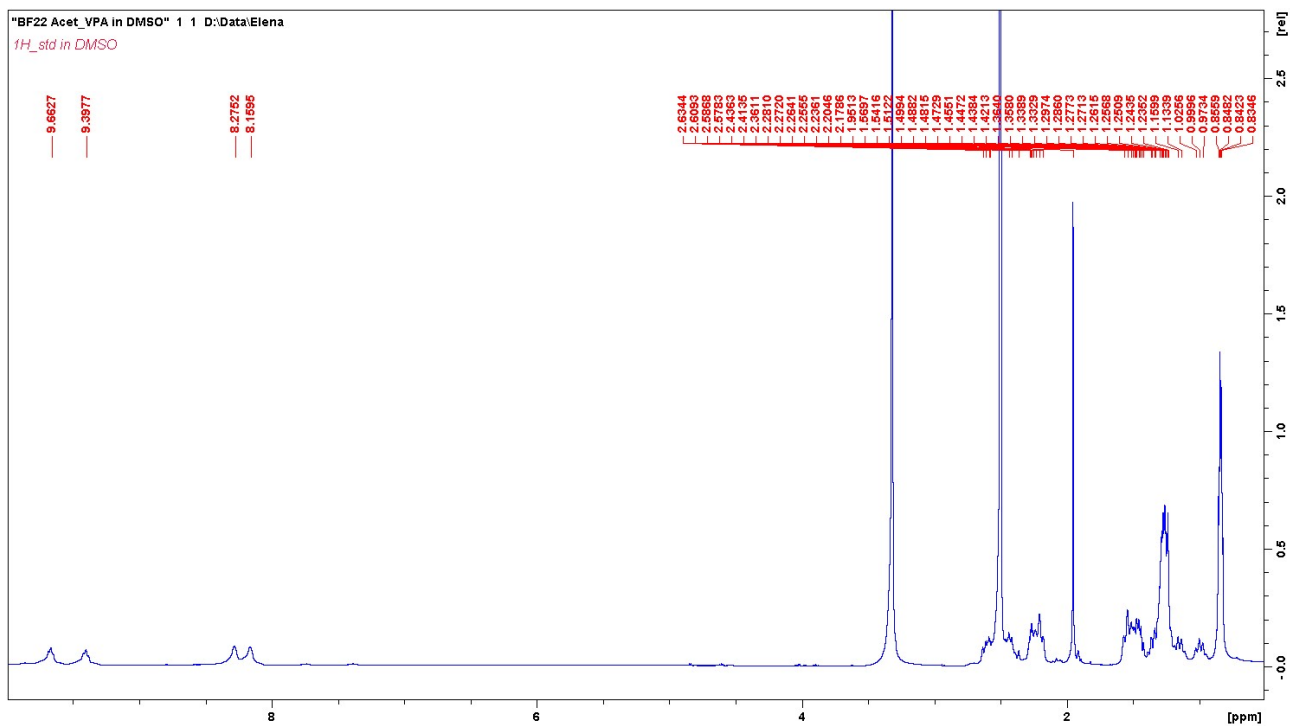

Figure S5.  $^1\text{H}$  NMR spectrum of **5** in  $\text{DMSO-d}_6$ .

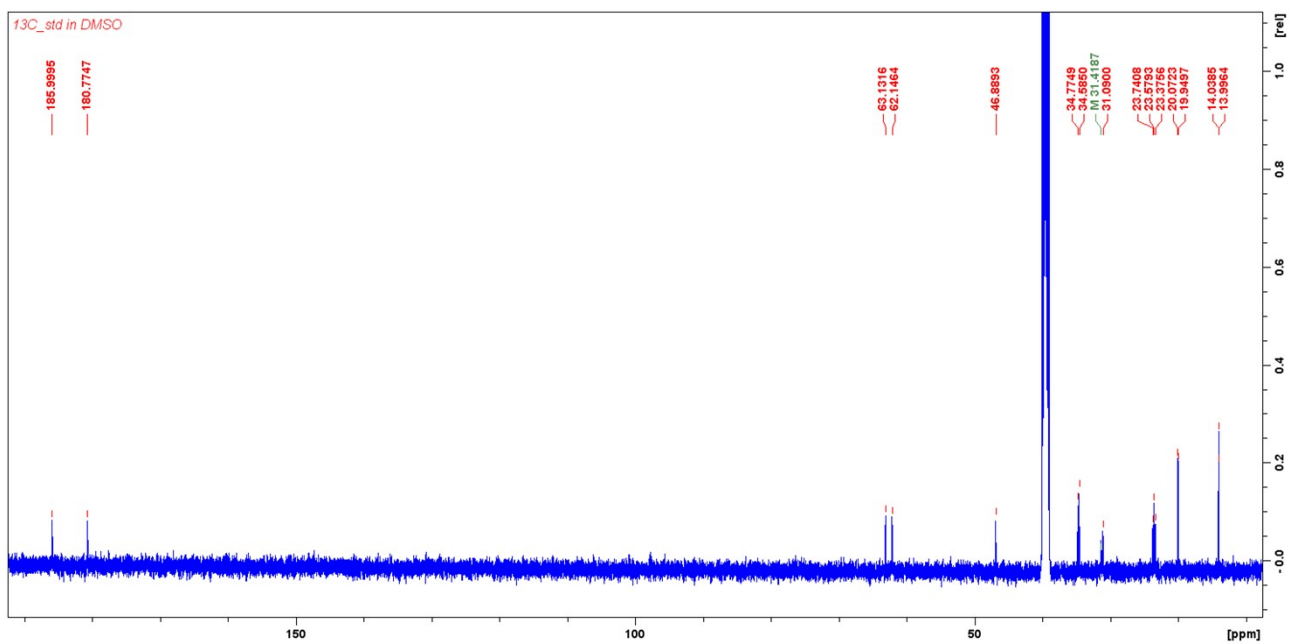

Figure S6.  $^{13}\text{C}$  NMR spectrum of **5** in  $\text{DMSO-d}_6$ .

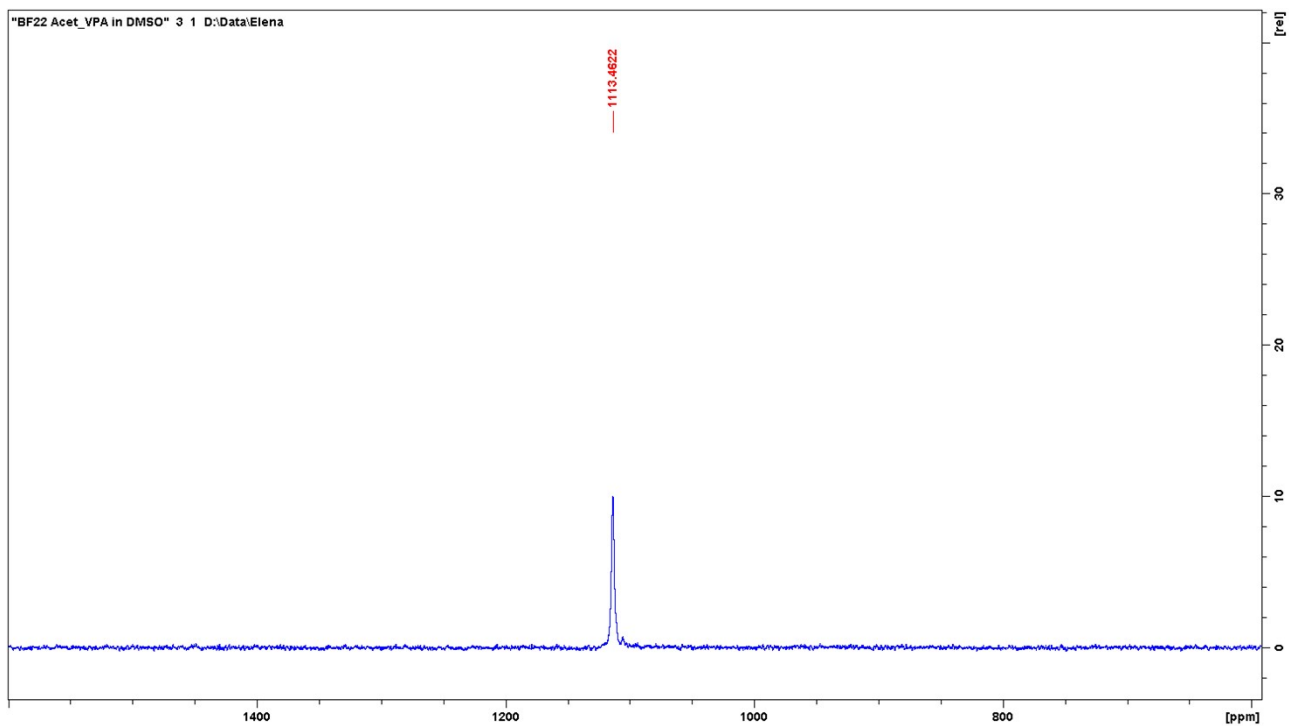

**Figure S7.**  $^{195}\text{Pt}$  NMR spectrum of **5** in  $\text{DMSO-d}_6$ .

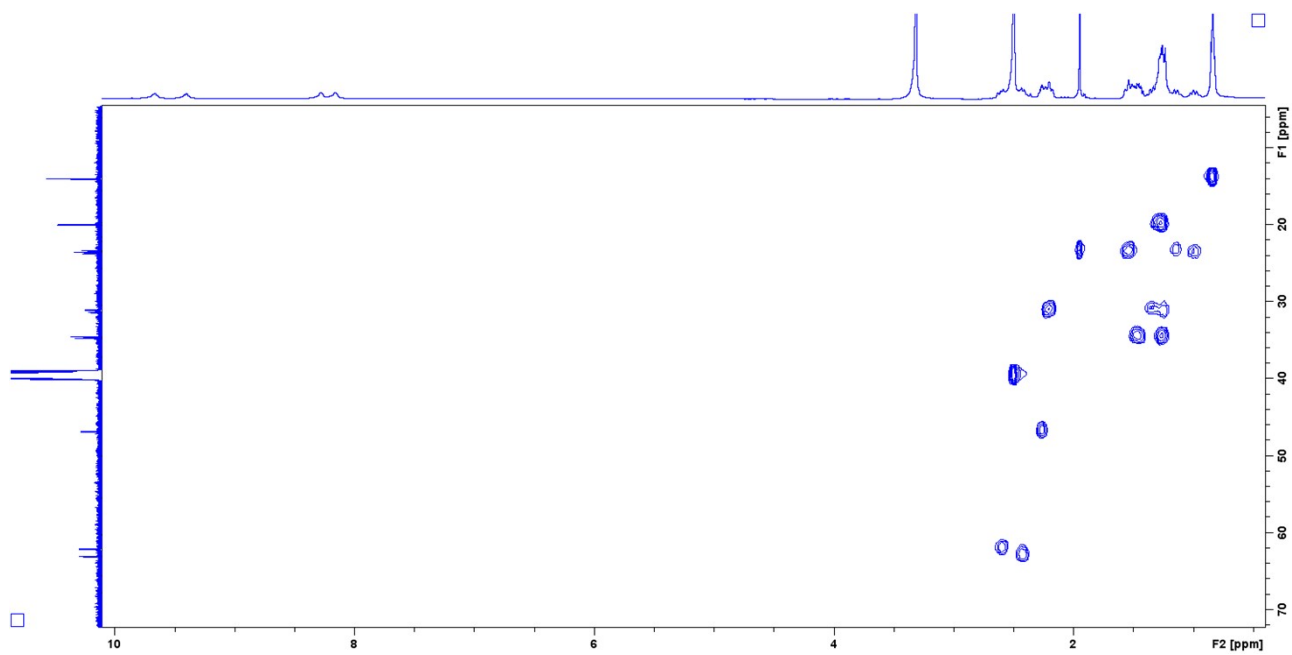

**Figure S8.**  $^1\text{H}$ - $^{13}\text{C}$  HSQC NMR spectrum of **5** in  $\text{DMSO-d}_6$ .

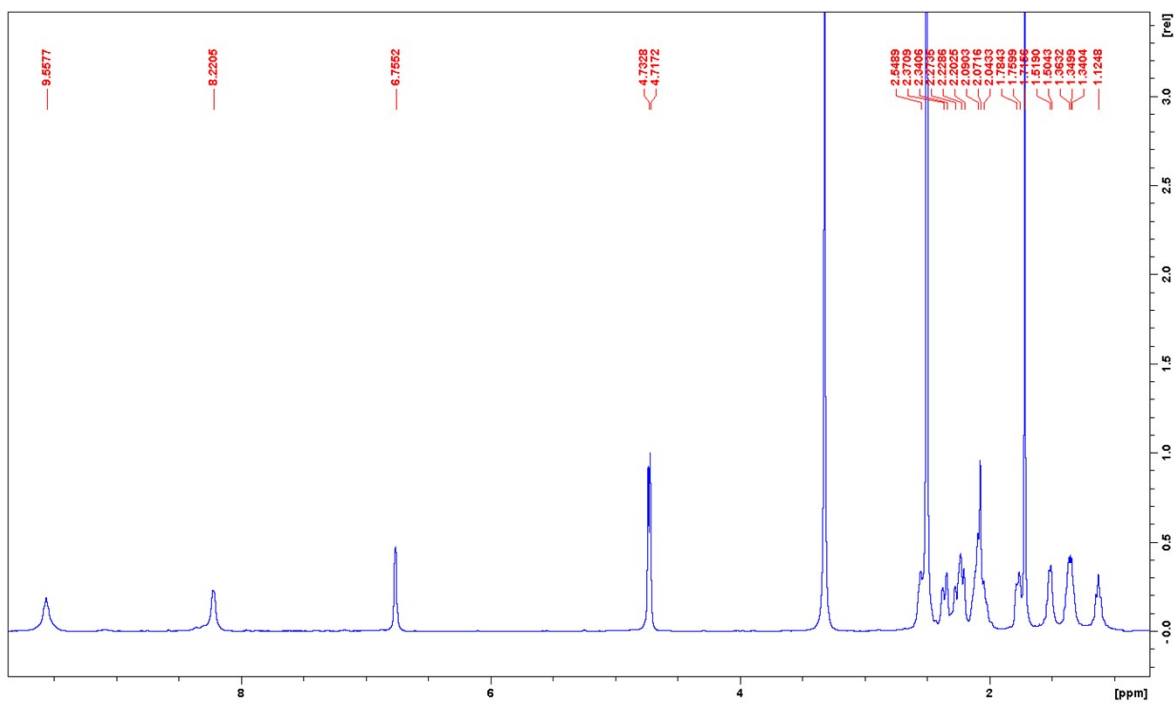

Figure S9.  $^1\text{H}$  NMR spectrum of **6** in  $\text{DMSO-d}_6$ .

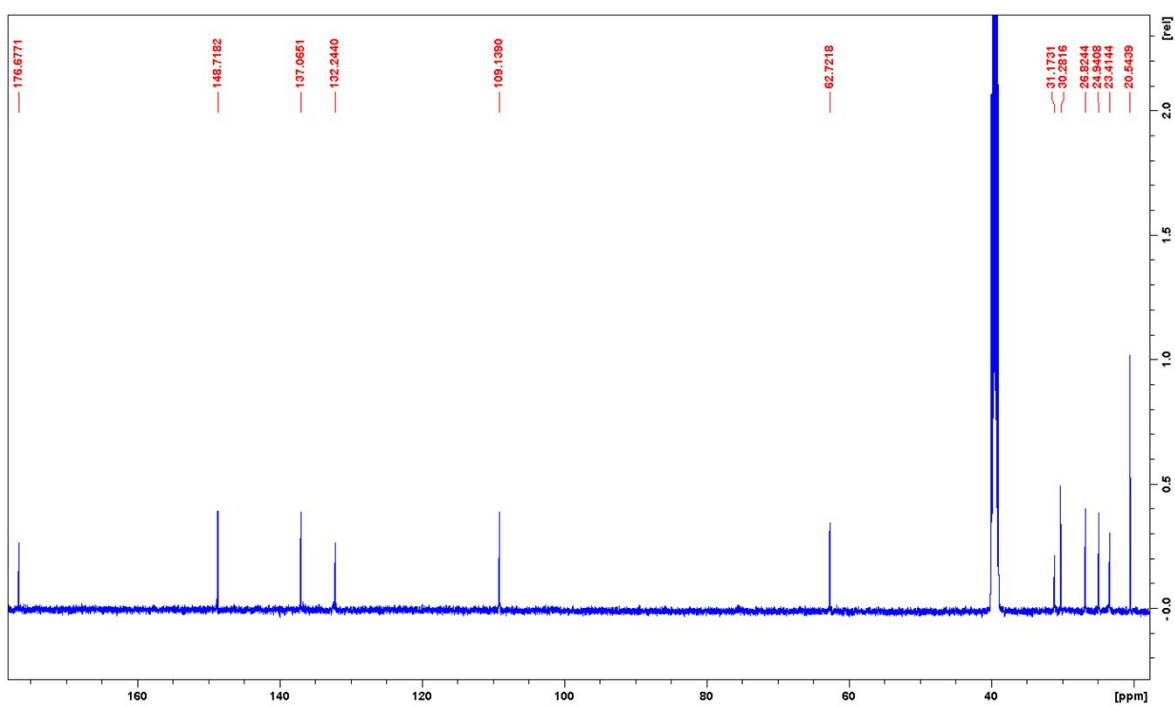

Figure S10.  $^{13}\text{C}$  NMR spectrum of **6** in  $\text{DMSO-d}_6$ .

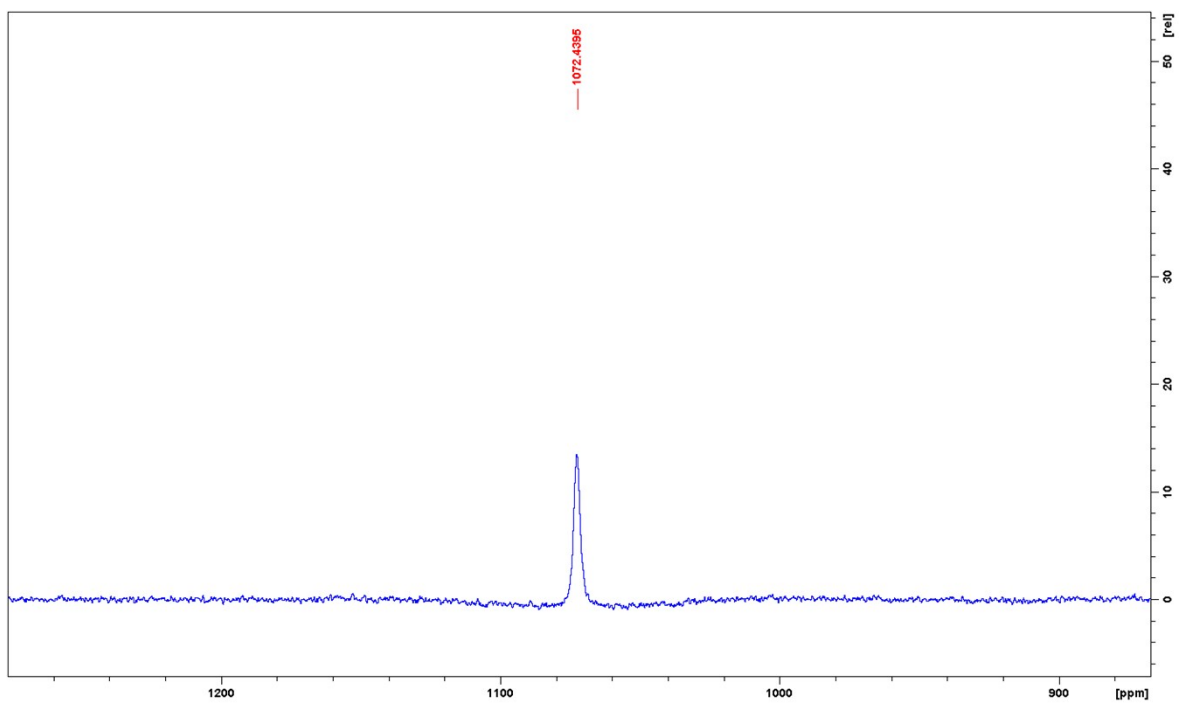

Figure S11.  $^{195}\text{Pt}$  NMR spectrum of **6** in  $\text{DMSO-d}_6$ .

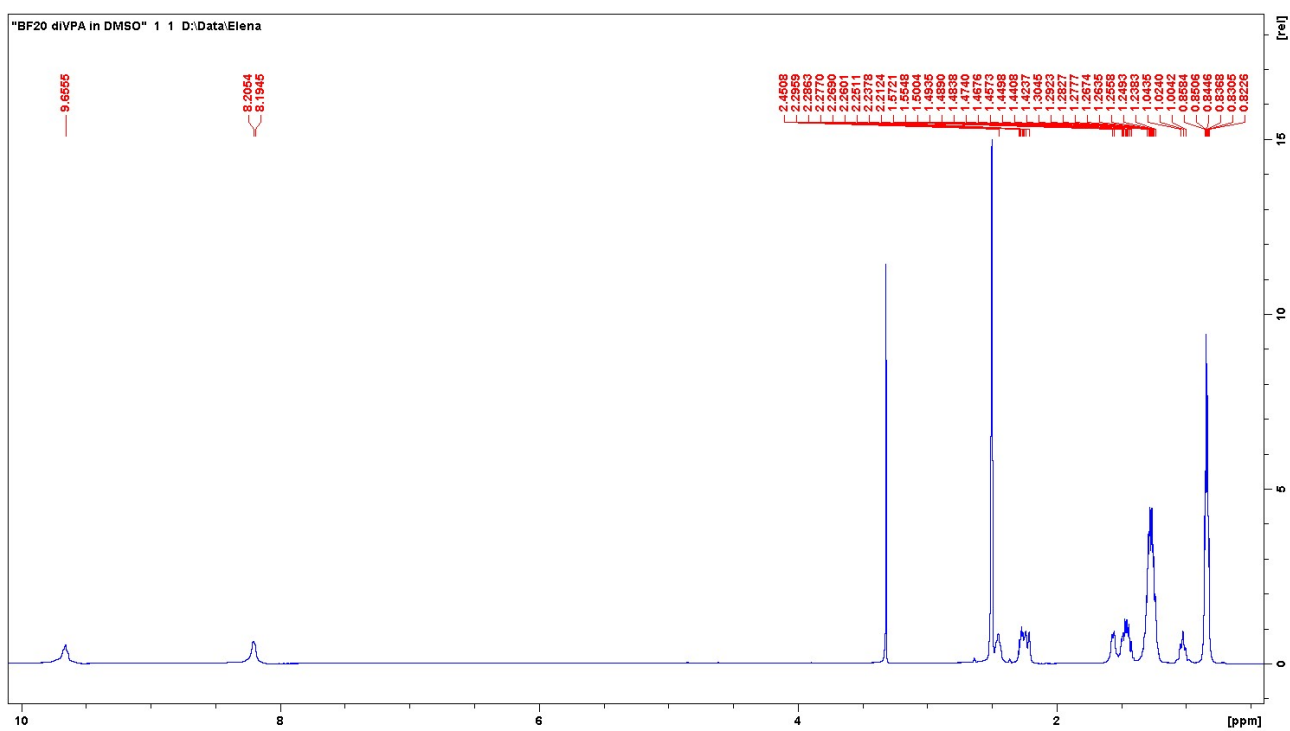

Figure S12.  $^1\text{H}$  NMR spectrum of **7** in  $\text{DMSO-d}_6$ .



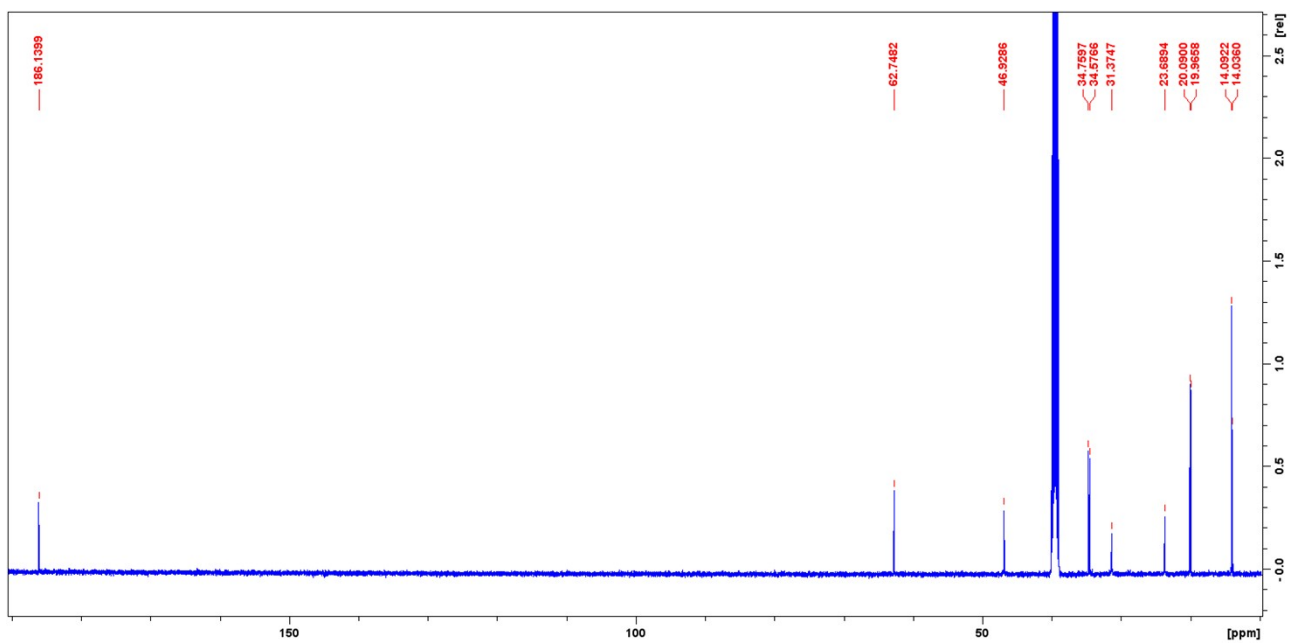

Figure S13.  $^{13}\text{C}$  NMR spectrum of **7** in  $\text{DMSO-d}_6$ .

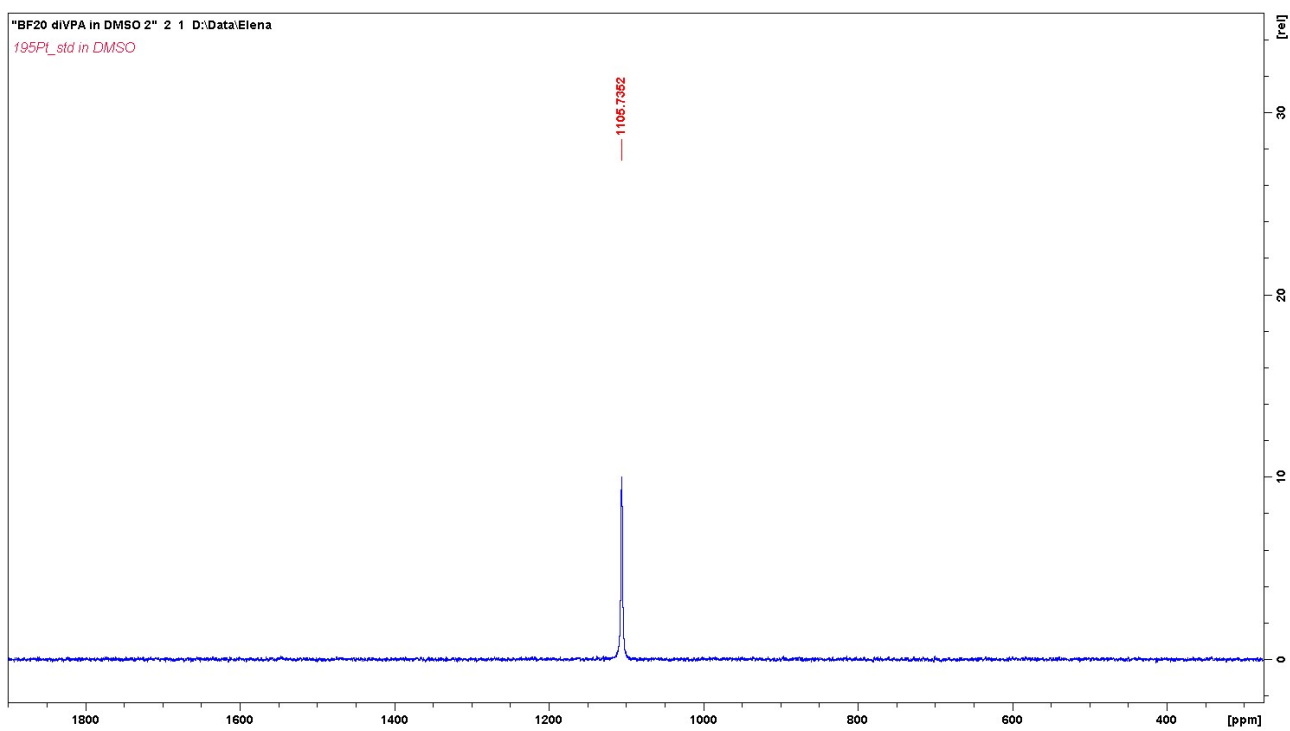

Figure S14.  $^{195}\text{Pt}$  NMR spectrum of **7** in  $\text{DMSO-d}_6$ .

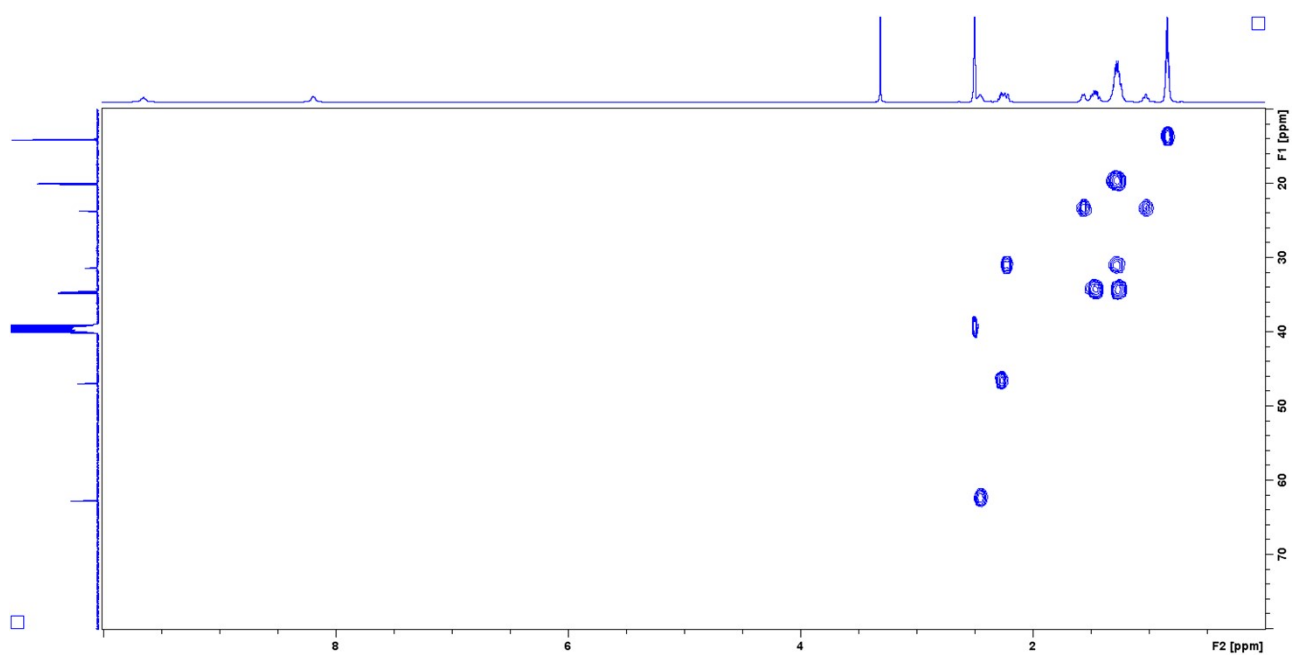

**Figure S15.**  $^1\text{H}$ - $^{13}\text{C}$  HSQC NMR spectrum of **7** in  $\text{DMSO-d}_6$ .

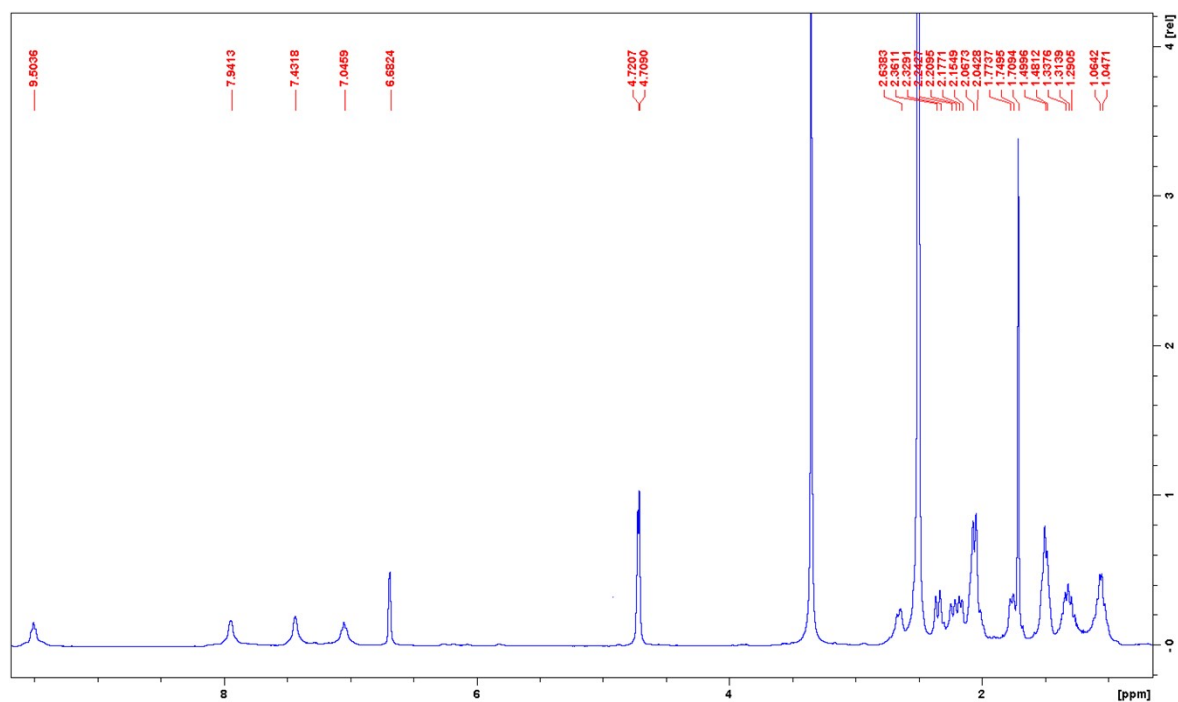

**Figure S16.**  $^1\text{H}$  NMR spectrum of **8** in  $\text{DMSO-d}_6$ .

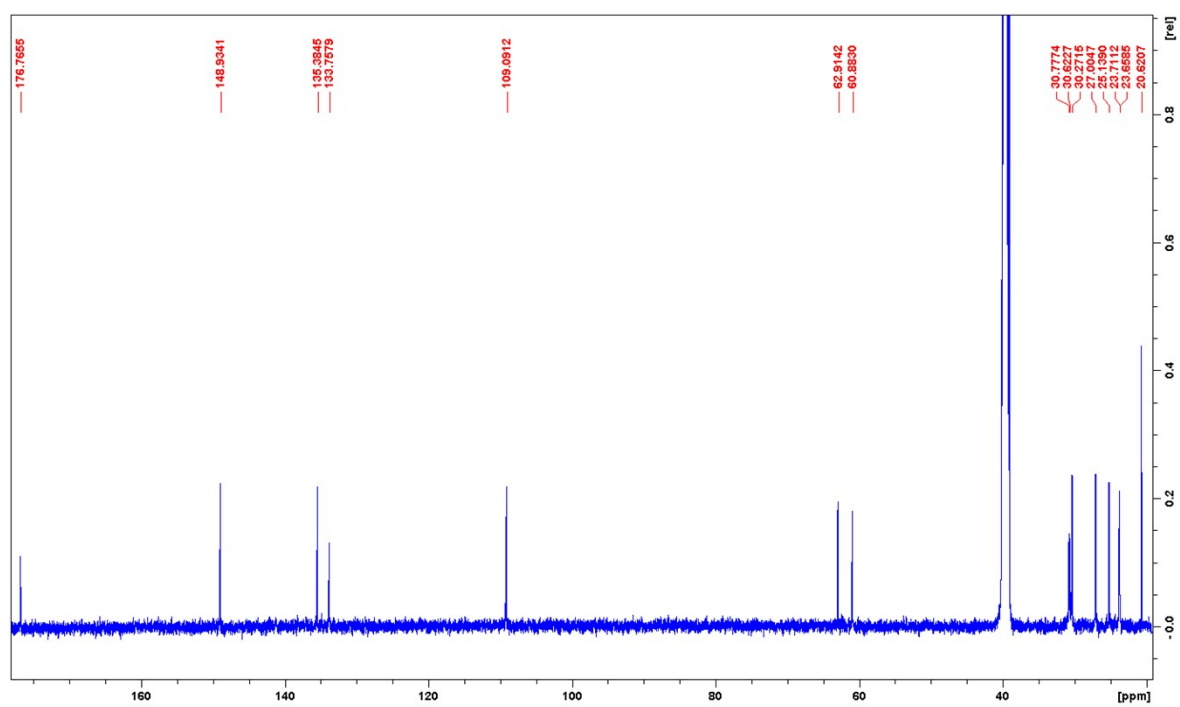

Figure S17.  $^{13}\text{C}$  NMR spectrum of **8** in  $\text{DMSO-d}_6$ .

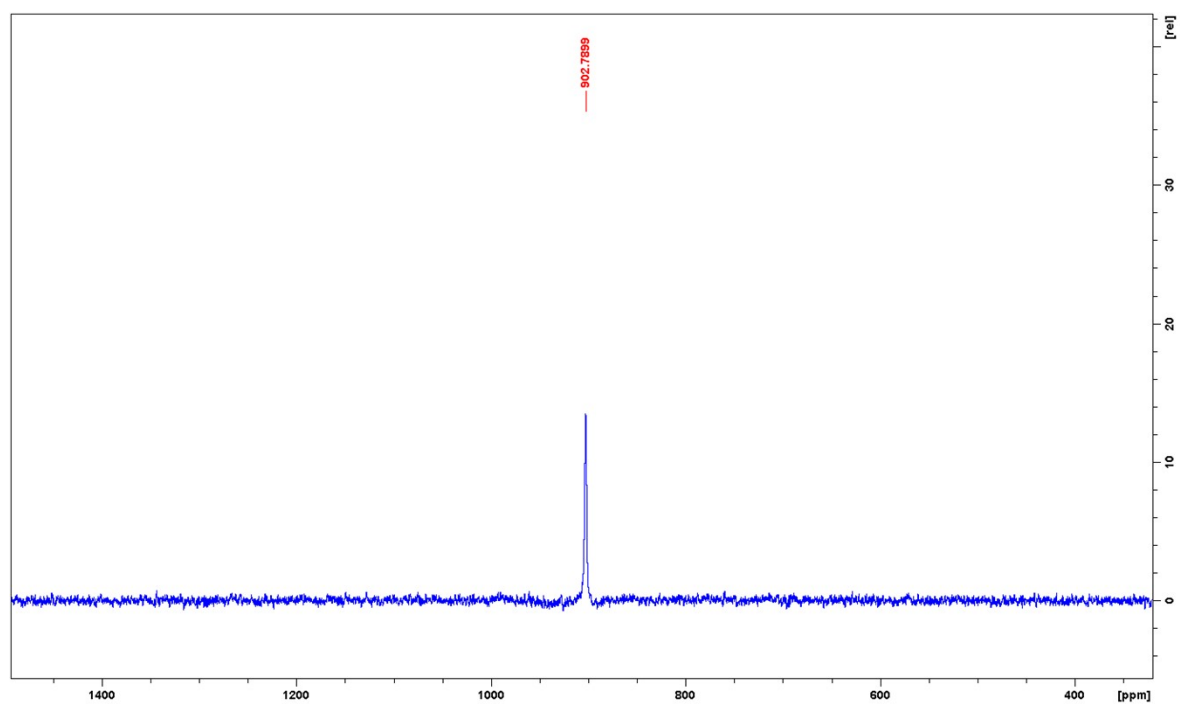

Figure S18.  $^{195}\text{Pt}$  NMR spectrum of **8** in  $\text{DMSO-d}_6$ .

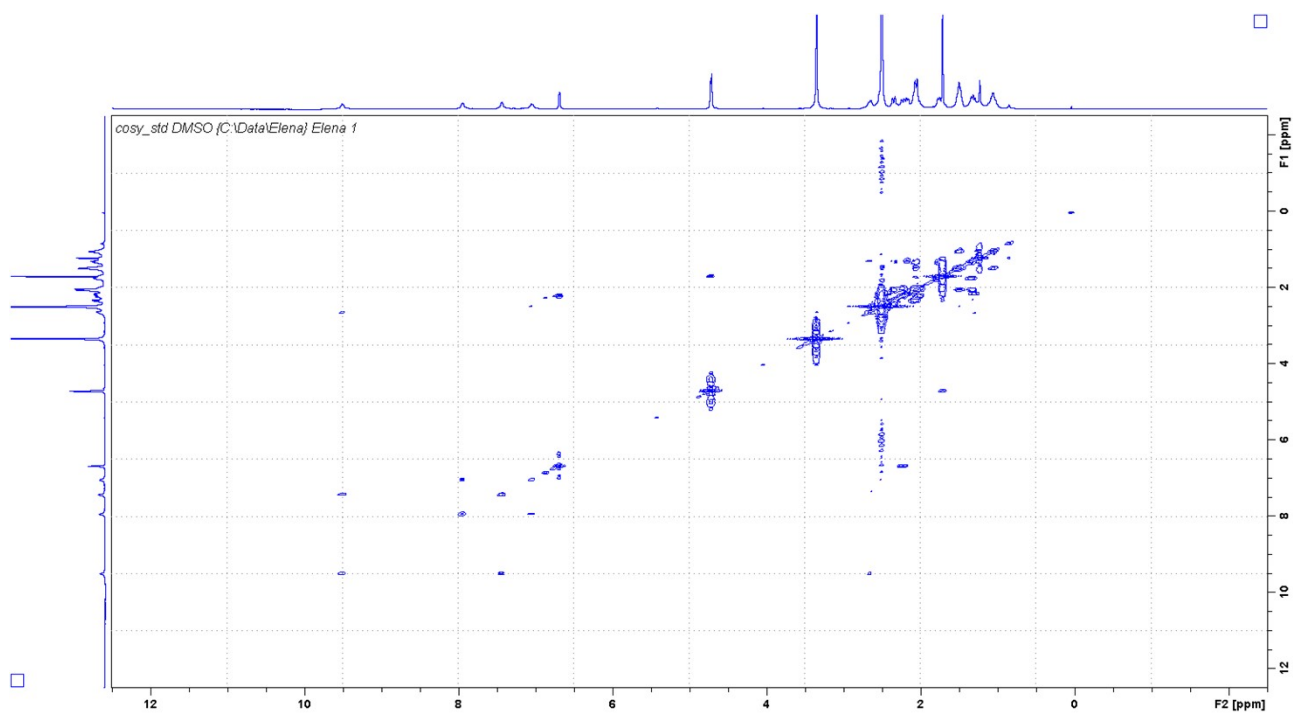

**Figure S19.**  $^1\text{H}$ - $^1\text{H}$  COSY NMR spectrum of **8** in  $\text{DMSO-d}_6$ .

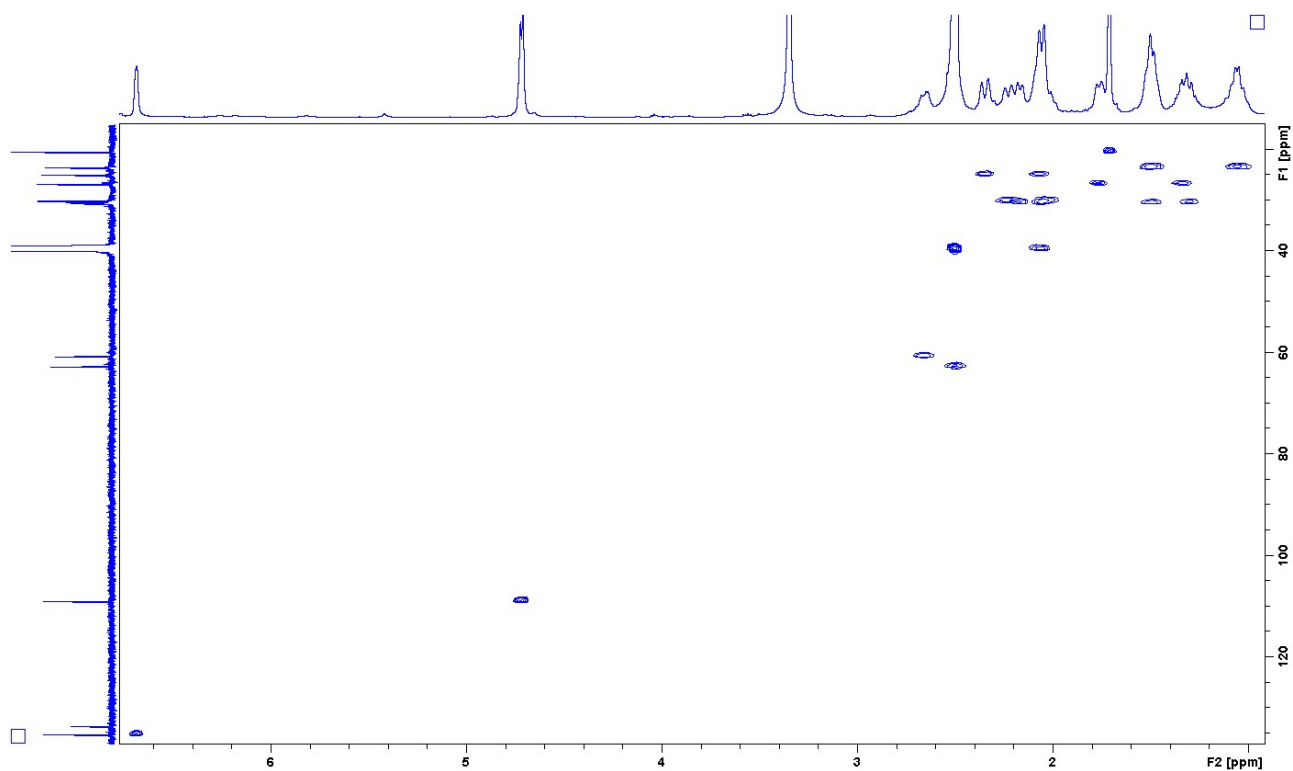

**Figure S20.**  $^1\text{H}$ - $^{13}\text{C}$  HSQC NMR spectrum of **8** in  $\text{DMSO-d}_6$ .

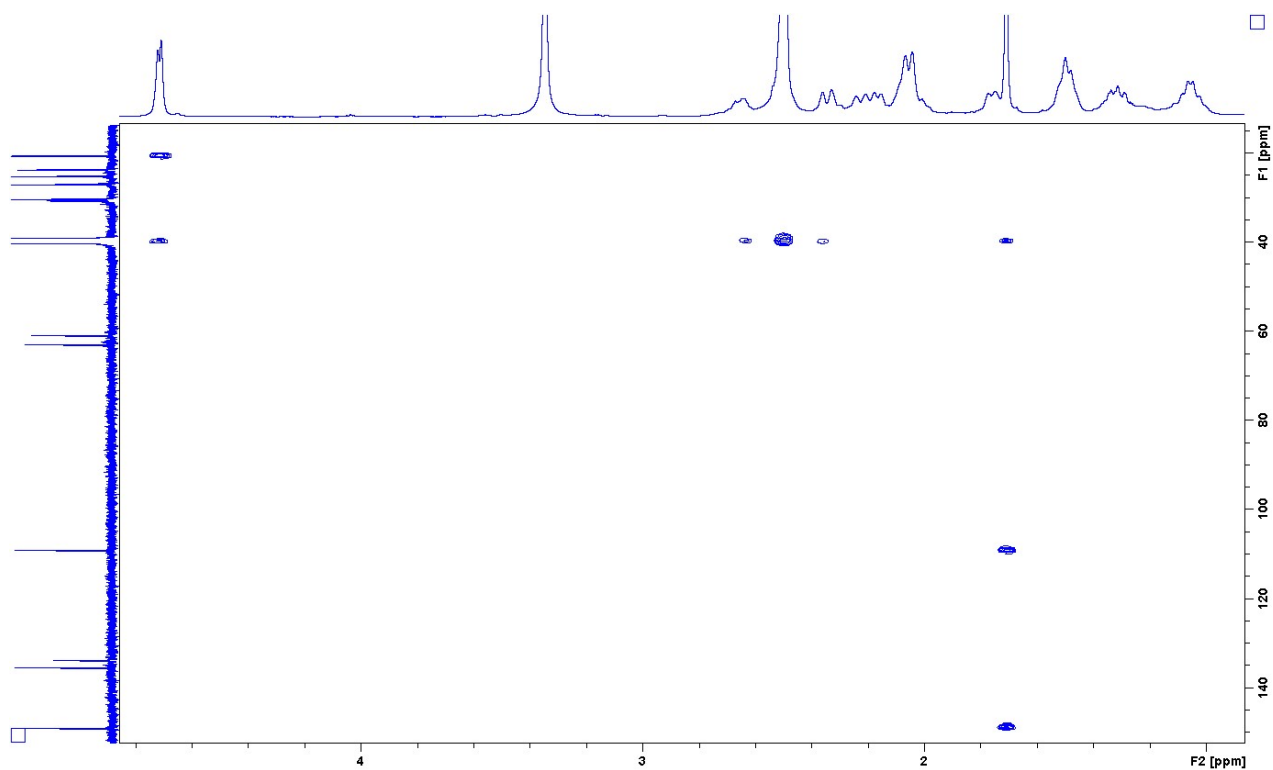

Figure S21.  $^1\text{H}$ - $^{13}\text{C}$  HMBC NMR spectrum of **8** in  $\text{DMSO-d}_6$ .

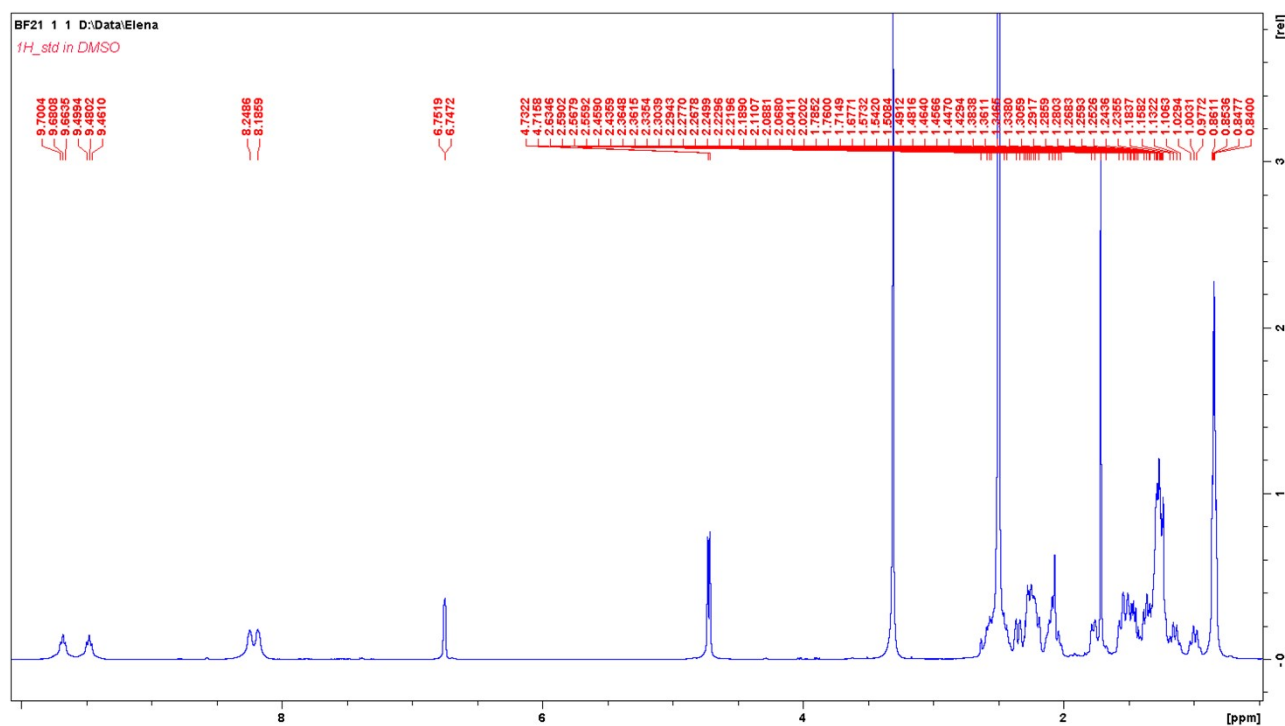

Figure S22.  $^1\text{H}$  NMR spectrum of **9** in  $\text{DMSO-d}_6$ .

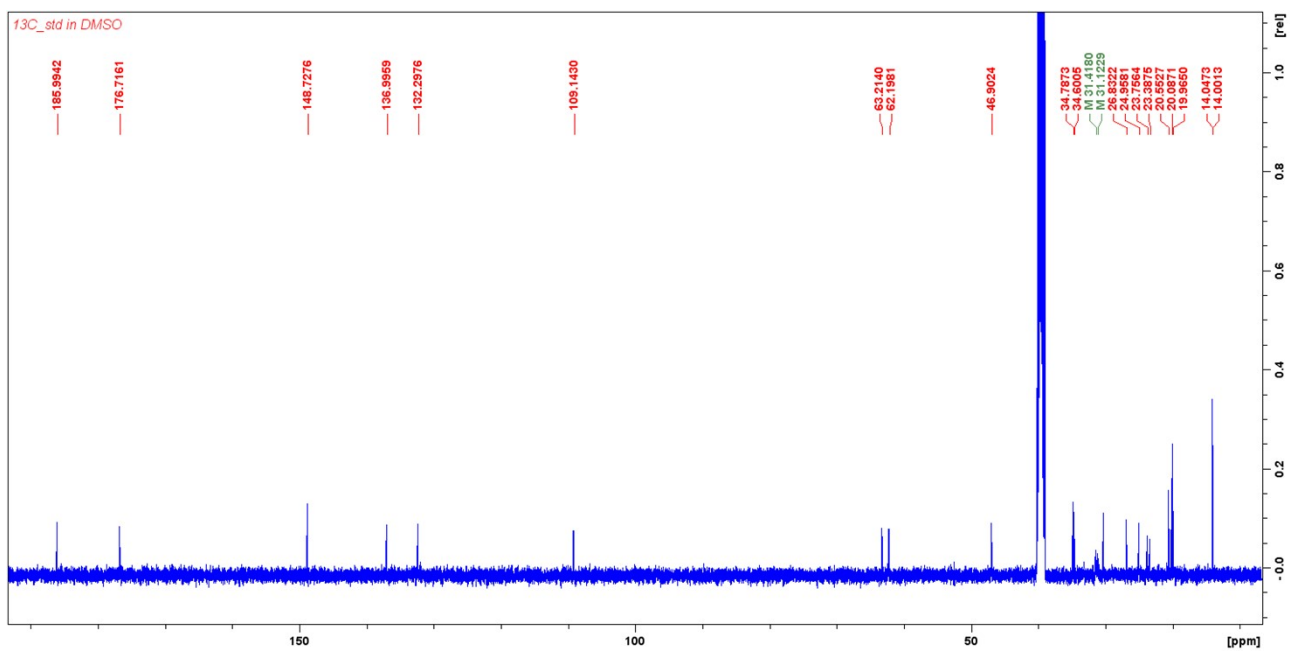

**Figure S23.**  $^{13}\text{C}$  NMR spectrum of **9** in  $\text{DMSO-d}_6$ .

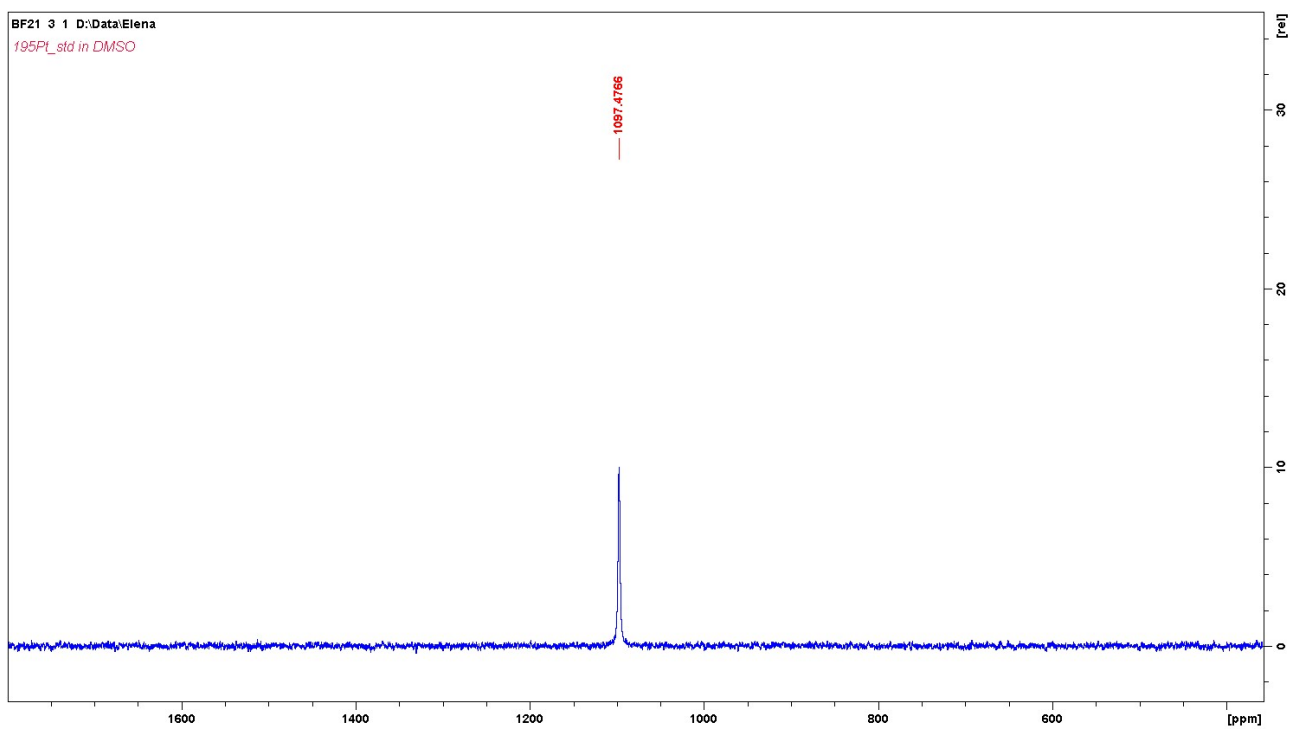

**Figure S24.**  $^{195}\text{Pt}$  NMR spectrum of **9** in  $\text{DMSO-d}_6$ .

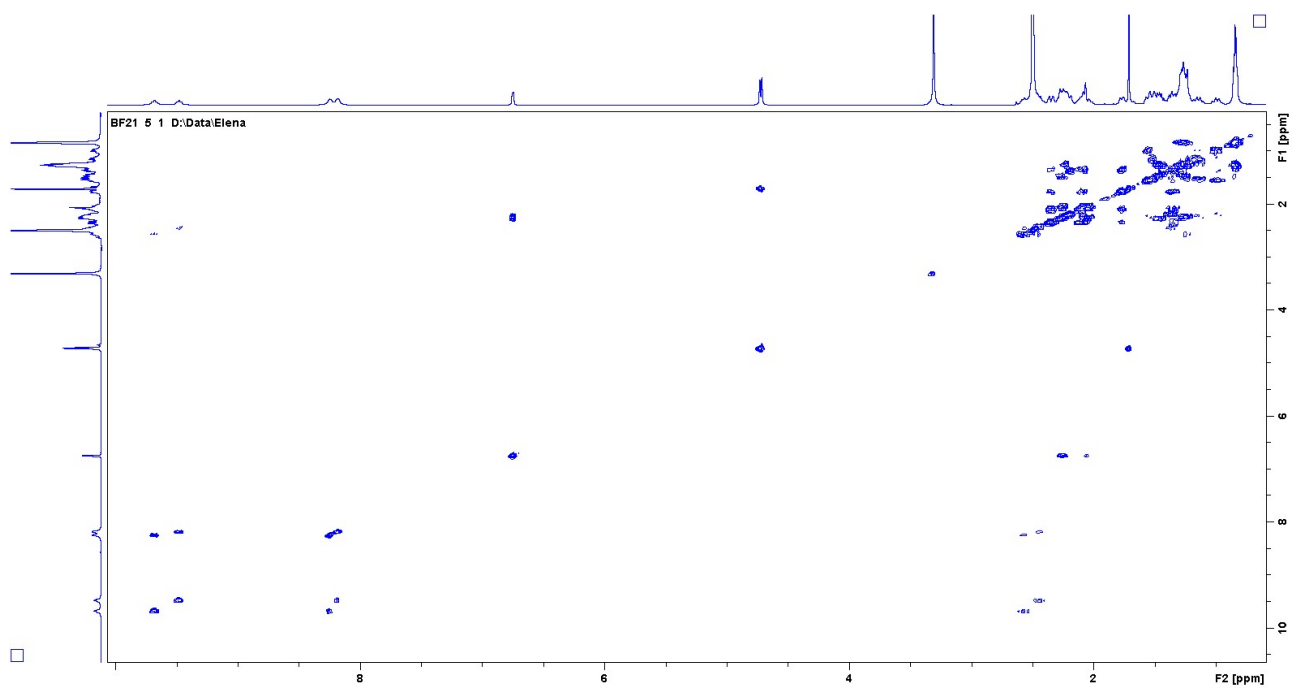

**Figure S25.**  $^1\text{H}$ - $^1\text{H}$  COSY NMR spectrum of **9** in  $\text{DMSO-d}_6$ .

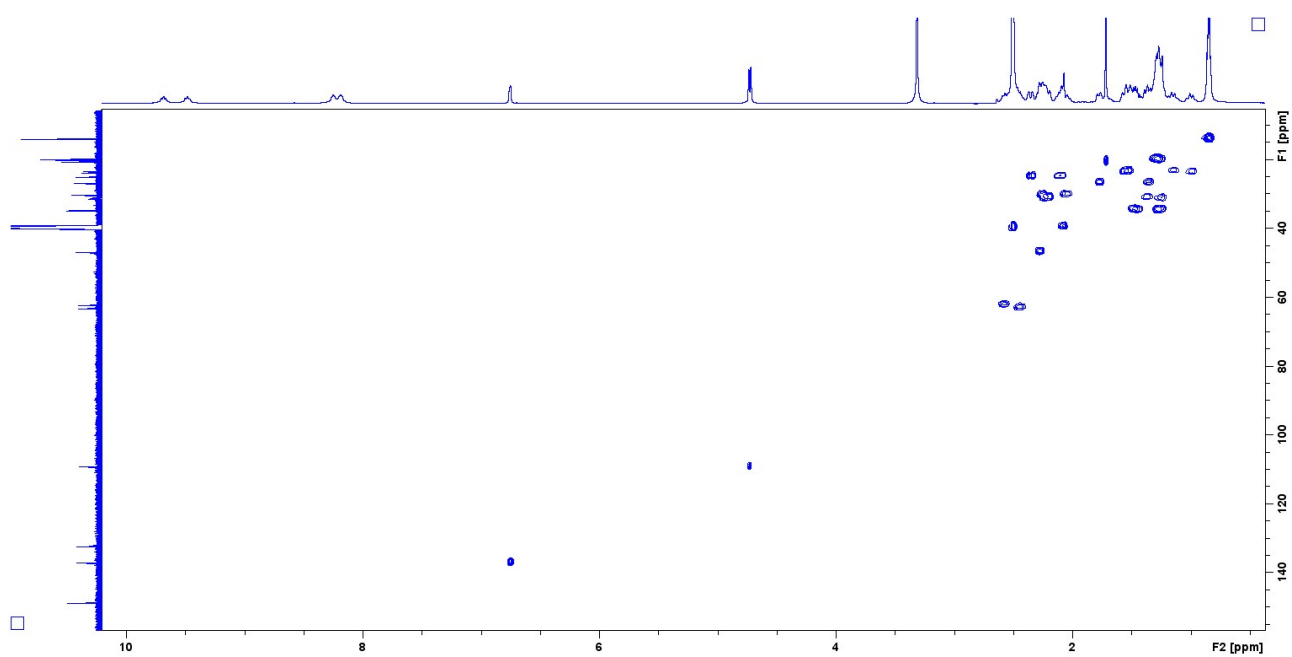

**Figure S26.**  $^1\text{H}$ - $^{13}\text{C}$  HSQC NMR spectrum of **9** in  $\text{DMSO-d}_6$ .

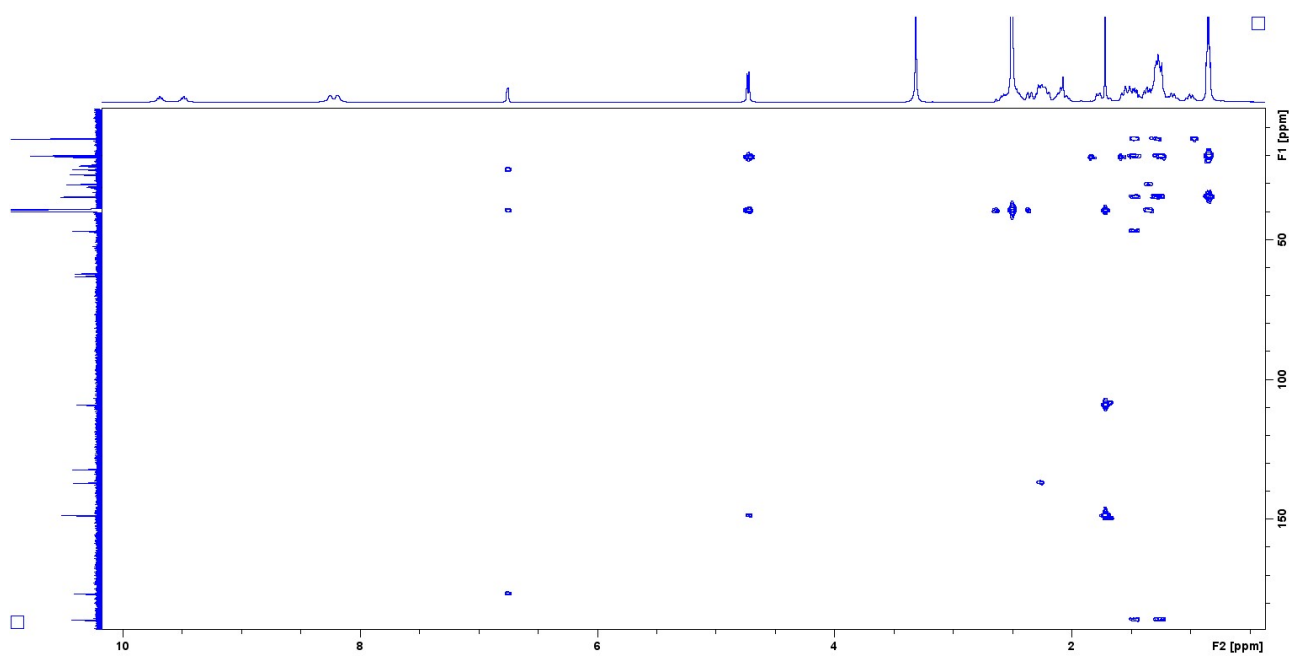

**Figure S27.**  $^1\text{H}$ - $^{13}\text{C}$  HMBC NMR spectrum of **9** in  $\text{DMSO-d}_6$ .
